# Supplementary material for: Meteorological, Impact and Climate perspectives of the 29 June 2017 Heavy Precipitation Event in the Berlin Metropolitan Area
Source: Copernicus journal article supplement (doi:10.5194/nhess-2022-96), 2022-04-05
Supplement: Supplementary file 1 [file nhess-2022-96-supplement.pdf]

# Supplementary Material

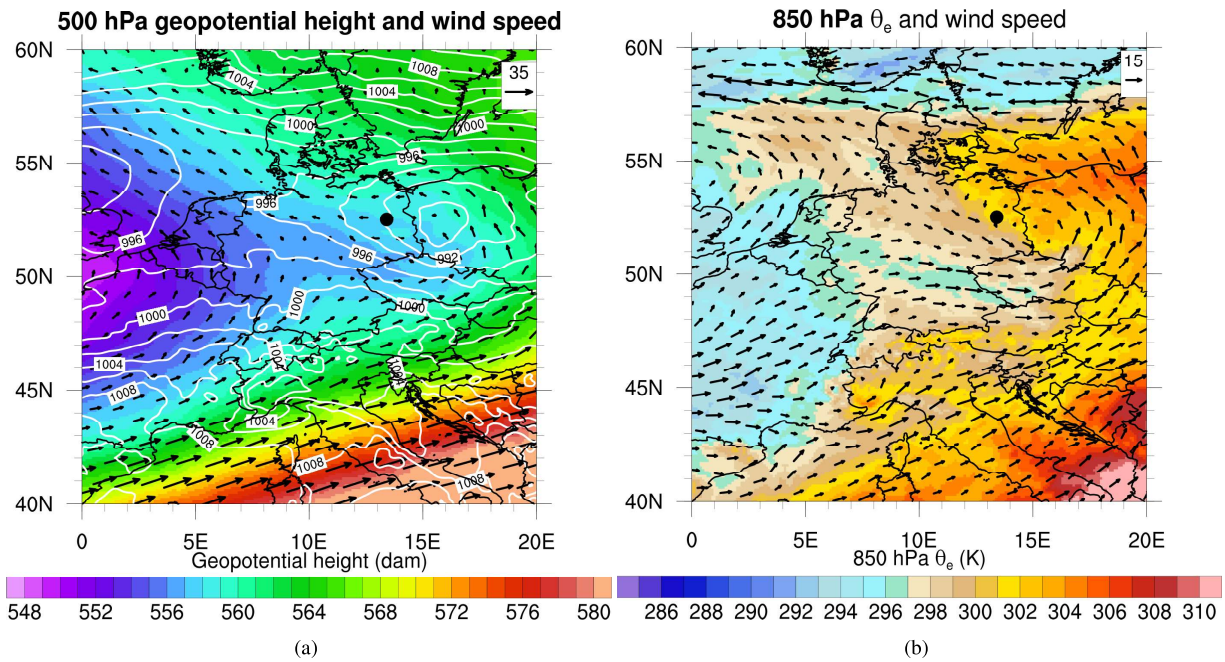

**Figure S1.** (a) 500 hPa geopotential height and wind speed ( $\text{m s}^{-1}$ ) and (b) 850 hPa equivalent potential temperature and wind speeds on 29 June, 2017 12 UTC from the ECMWF analysis. The black dot denotes the city of Berlin.

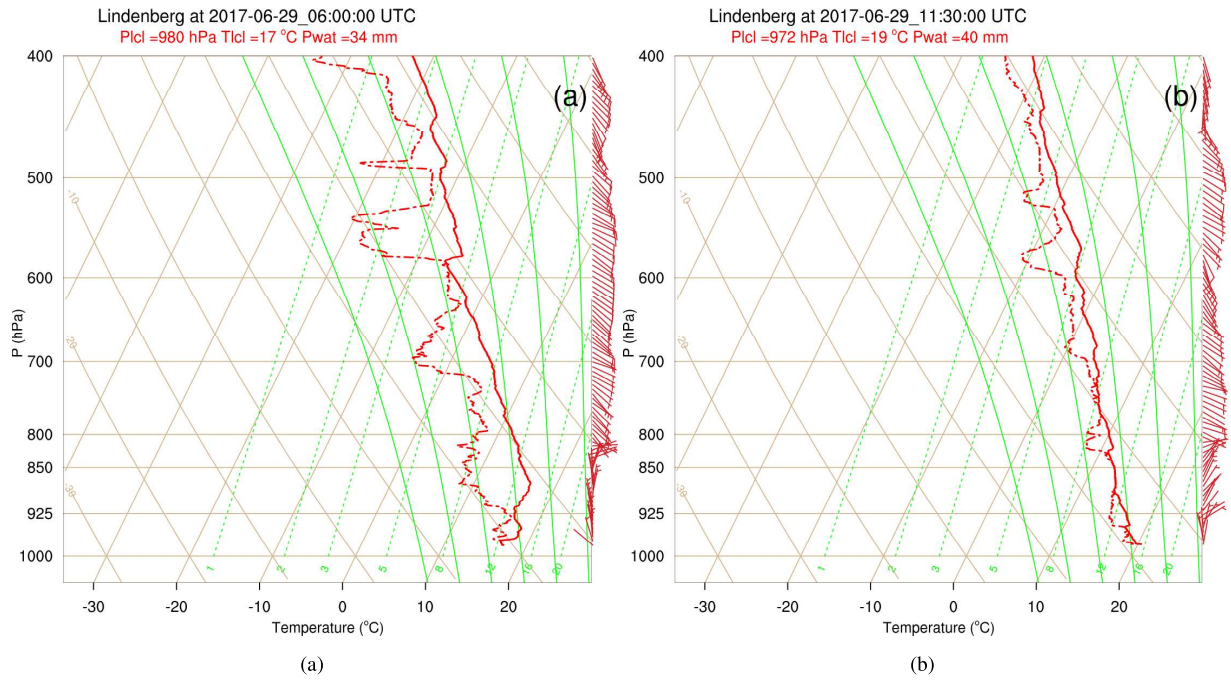

**Figure S2.** Radiosoundings from Lindenberg (southeast of Berlin), valid at 06 UTC (left) and 12 UTC (middle), 29 June 2017.

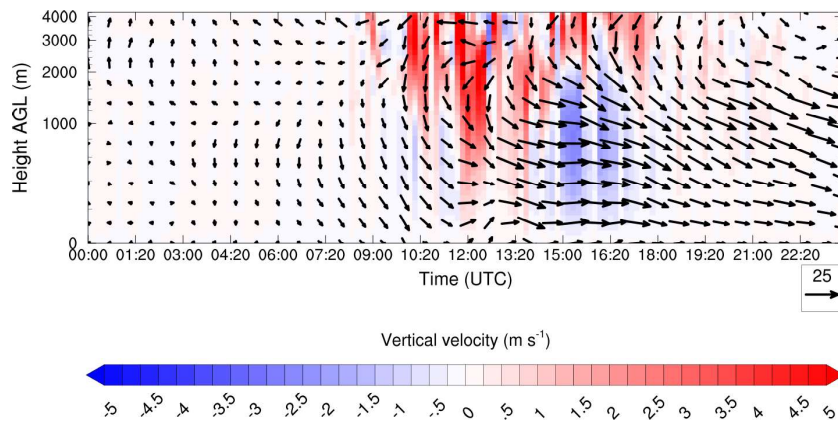

**Figure S3.** Time-height cross section of the simulated vertical velocities at the same location as in Fig. 5 (near 13.2 °E and 52.85 °E, black dot in Fig. S1).

**Table S1.** List of the 20 highest 24-hour precipitation totals (mm) in the federal state of Brandenburg (BB), Berlin (BE) and southern Mecklenburg-Western Pomerania (MV) on 29 June 2017 (DWD stations).

| ID   | Name                                  | Rainfall (mm) | Coordinates      |
|------|---------------------------------------|---------------|------------------|
| 430  | Berlin-Tegel (BE)                     | 196.9         | 52.56°N, 13.32°E |
| 5983 | Zeesen (BB)                           | 149.9         | 52.26°N, 13.62°E |
| 2733 | Kremmen-Groß Ziethen (BB)             | 130.6         | 52.73°N, 13.01°E |
| 5307 | Berge/Prignitz (BB)                   | 124.0         | 53.24°N, 11.87°E |
| 3205 | Marwitz (Wasserwerk) (BB)             | 113.2         | 52.66°N, 13.18°E |
| 3196 | Marnitz (MV)                          | 112.9         | 53.32°N, 11.93°E |
| 433  | Berlin-Tempelhof (BE)                 | 112.8         | 52.47°N, 13.40°E |
| 4013 | Pritzwalk (BB)                        | 110.0         | 53.17°N, 12.16°E |
| 2531 | Karstädt/Prignitz (BB)                | 109.2         | 53.17°N, 11.75°E |
| 2863 | Langerwisch (BB)                      | 106.5         | 52.32°N, 13.07°E |
| 4637 | Staaken (BB)                          | 106.0         | 52.54°N, 13.12°E |
| 7413 | Grabow-Stadt (MV)                     | 105.4         | 53.28°N, 11.56°E |
| 2779 | Kuhbier (BB)                          | 103.6         | 53.15°N, 12.09°E |
| 5555 | Thyrow (BB)                           | 103.2         | 52.25°N, 13.24°E |
| 2472 | Jühnsdorf-Blankenfelde (BB)           | 103.0         | 52.32°N, 13.39°E |
| 5825 | Berge /BB)                            | 102.6         | 52.62°N, 12.79°E |
| 2637 | Klink (MV)                            | 100.4         | 53.46°N, 12.61°E |
| 400  | Berlin-Buch (BE)                      | 99.3          | 52.63°N, 13.50°E |
| 426  | Berlin-Schmöckwitz (BE)               | 95.2          | 52.38°N, 13.62°E |
| 4894 | Hennigsdorf b. Berlin-Stolpe-Süd (BB) | 95.0          | 52.63°N, 13.23°E |

## Comparing the return periods of the 29 June 2017 and 14 July 2021 extreme events

Here, we will discuss the 2017 extreme event in the context of the Kreienkamp et al. (2021) study as the events exhibit similarities regarding the local scale and its convective characteristic. It should be noted, however, that Kreienkamp et al. (2021) has been a rapid attribution study which has not gone through peer-review yet. The July 2021 severe precipitation at the Ahr, Erft and Meuse has been an extremely rare event – so rare that estimation of a return period for the combined Ahr and Erft catchment is challenging. Thus, a pooling approach, whereby tiles of equal size in a wider region around the event are used to estimate the return period and the impact of anthropogenic climate change on the event, was applied. Choosing such an approach was based on the assumption that the given event could have occurred anywhere in a wider region around the event. It was found that in any 130x130km tile within the wider region, one such event can be expected every 400 years, which means that several such events would occur in the wider western European region in 400 years.

To put the event we analyse here into the context of Kreienkamp et al. (2021), we compare the return periods of the events. Table S2 gives the return period of the 2017 event, spatially averaged over regions of different sizes (see also Sect. 3.5). The return period of the 2017 event, which has locally quite long return periods, decreases to 75 years when averaged over an area of 11,100 km<sup>2</sup> (100 × 111 km, yellow box in Figure 7), which is still smaller than the area size selected in Kreienkamp et al. (2021). Thus, the 2017 event has a lower return period than the 2021 event on a regional scale.

**Table S2.** Return period estimates for spatially averaged daily precipitation accumulation for regions of different size. The three regions (pink, grey, brown) are shown in Figure 9.

| Region | Latitude [°]<br>south corner | Latitude [°]<br>north corner | Longitude [°]<br>west corner | Longitude [°]<br>east corner | Area size [km <sup>2</sup> ] | 24-hour<br>precipitation [mm] | Return period<br>[years] |
|--------|------------------------------|------------------------------|------------------------------|------------------------------|------------------------------|-------------------------------|--------------------------|
| pink   | 52.47                        | 52.62                        | 13.20                        | 13.50                        | 340                          | 134.5                         | 429                      |
| grey   | 52.25                        | 52.75                        | 12.75                        | 13.75                        | 3.720                        | 99.0                          | 161                      |
| brown  | 52.00                        | 53.00                        | 12.50                        | 14.00                        | 11.100                       | 75.7                          | 75                       |

## Conditional Event Attribution

### CMIP6 models and climate-change signal

The CMIP6 models from which we compute the climate-change signal are shown in Table S3. To compute the climate change signal, we first calculate the mean temperature from the CMIP6 pre-industrial simulations from 1850-1859 across all models for the months of June and July (our event occurs on 29<sup>th</sup> June) and average over the 0.11° domain (Figure S4). This is then repeated for the years 2007-2016, representative of the present climate. As the CMIP6 historical simulations end in 2014, the years 2015 and 2016 are taken from the SSP245 scenario. The actual choice of scenario here is not relevant, because the divergence between the different scenarios from 2015-2016 is trivial. The difference between the 2007-2016 and the 1850-

1055 1859 climate is then taken. This difference is the basis for creating the pre-industrial boundary conditions from the observed boundary conditions, as described in the main manuscript.

**Table S3.** CMIP6 GCMs used to compute the climate-change signal used for adjusting the initial and lateral boundary conditions in the conditional event attribution study. The 17 GCMs were selected as they were the only ones for which soil temperature data were also available.

|    | <b>GCM</b>    | <b>Experiment</b> | <b>Institute</b>    |
|----|---------------|-------------------|---------------------|
| 1  | BCC-CSM2-MR   | r1i1p1f1          | BCC                 |
| 2  | FGOALS-f3-L   | r1i1p1f1          | CAS                 |
| 3  | FGOALS-g3     | r1i1p1f1          | CAS                 |
| 4  | CanESM5       | r1i1p1f1          | CCCma               |
| 5  | CMCC-CM2-SR5  | r1i1p1f1          | CMCC                |
| 6  | ACCESS-ESM1-5 | r1i1p1f1          | CSIRO               |
| 7  | ACCESS-CM2    | r1i1p1f1          | CSIRO-ARCCSS        |
| 8  | MPI-ESM1-2-HR | r1i1p1f1          | DKRZ                |
| 9  | EC-Earth3     | r1i1p1f1          | EC-Earth-Consortium |
| 10 | IPSL-CM6A-LR  | r1i1p1f1          | IPSL                |
| 11 | MIROC6        | r1i1p1f1          | MIROC               |
| 12 | MPI-ESM1-2-LR | r1i1p1f1          | MPI-M               |
| 13 | MRI-ESM2-0    | r1i1p1f1          | MRI                 |
| 14 | CESM2-WACCM   | r1i1p1f1          | NCAR                |
| 15 | NorESM2-LM    | r1i1p1f1          | NCC                 |
| 16 | NorESM2-MM    | r1i1p1f1          | NCC                 |
| 17 | KACE-1-0-G    | r1i1p1f1          | NIMS-KMA            |

### **COSMO-CLM settings**

The model domains of the 0.11° and 0.025° simulations are shown in Figure S4. Note that the 0.11° domain shown is the central domain of the different domain-shift ensemble members (see main manuscript for explanation); the 0.025° domain remains constant in all simulations. Some further details of the simulations include:

- 0.11° ensemble members are initialized on 28<sup>th</sup> June 2017 at 12:00 UTC.
- 0.025° ensemble members are initialized on 28<sup>th</sup> June 2017 at 23:00 UTC.
- Model settings for the 0.025° simulations are the same as those used by the *Deutscher Wetterdienst* in their 0.025° COSMO-DE setup.
- The 0.025° boundary conditions include cloud ice, cloud water and cloud graupel

- The 0.025° setup has a relaxation zone of 50 km, a model top at 22.7 km and grid dimensions of 421/461/50 (lon/lat/height)
- Lateral boundary conditions are updated every hour for all simulations.

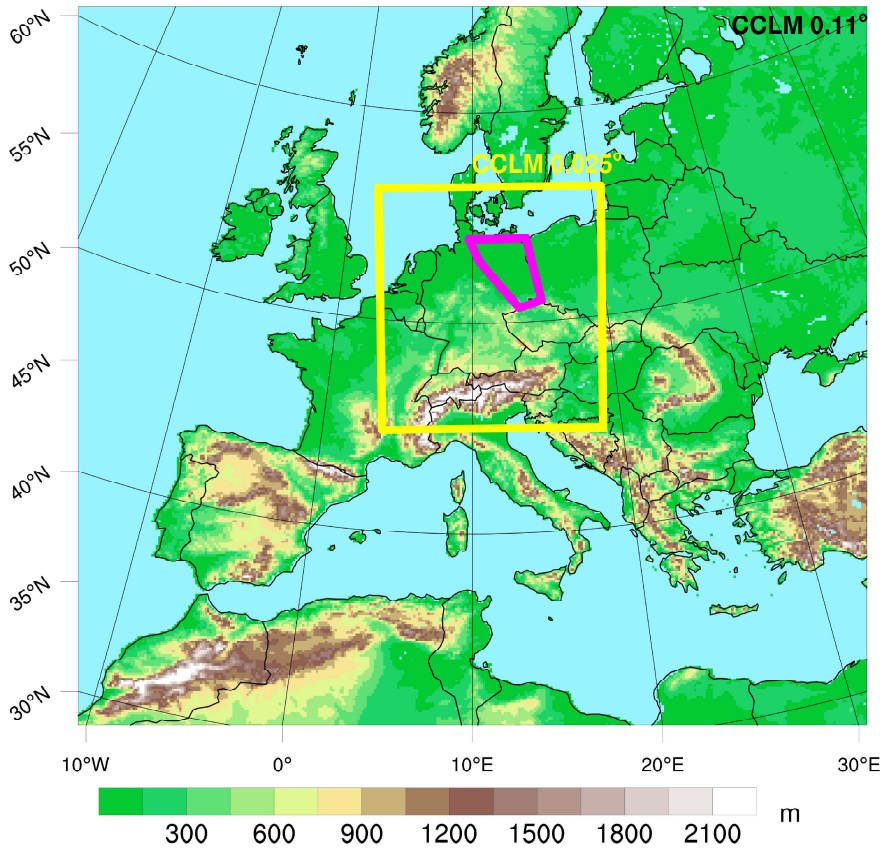

**Figure S4.** Central 0.11° simulation domain used in the conditional attribution study of Section 3.6.1 (recall from the description in the main manuscript that the ensemble is created using the domain-shift technique (Rezacova et al., 2009), whereby the boundaries and centre of the 0.11° domain are systematically shifted for each member); shading shows the orography of the 0.11° domain. The 0.025° simulation domain is marked in yellow. The magenta polygon marks the analysis region.

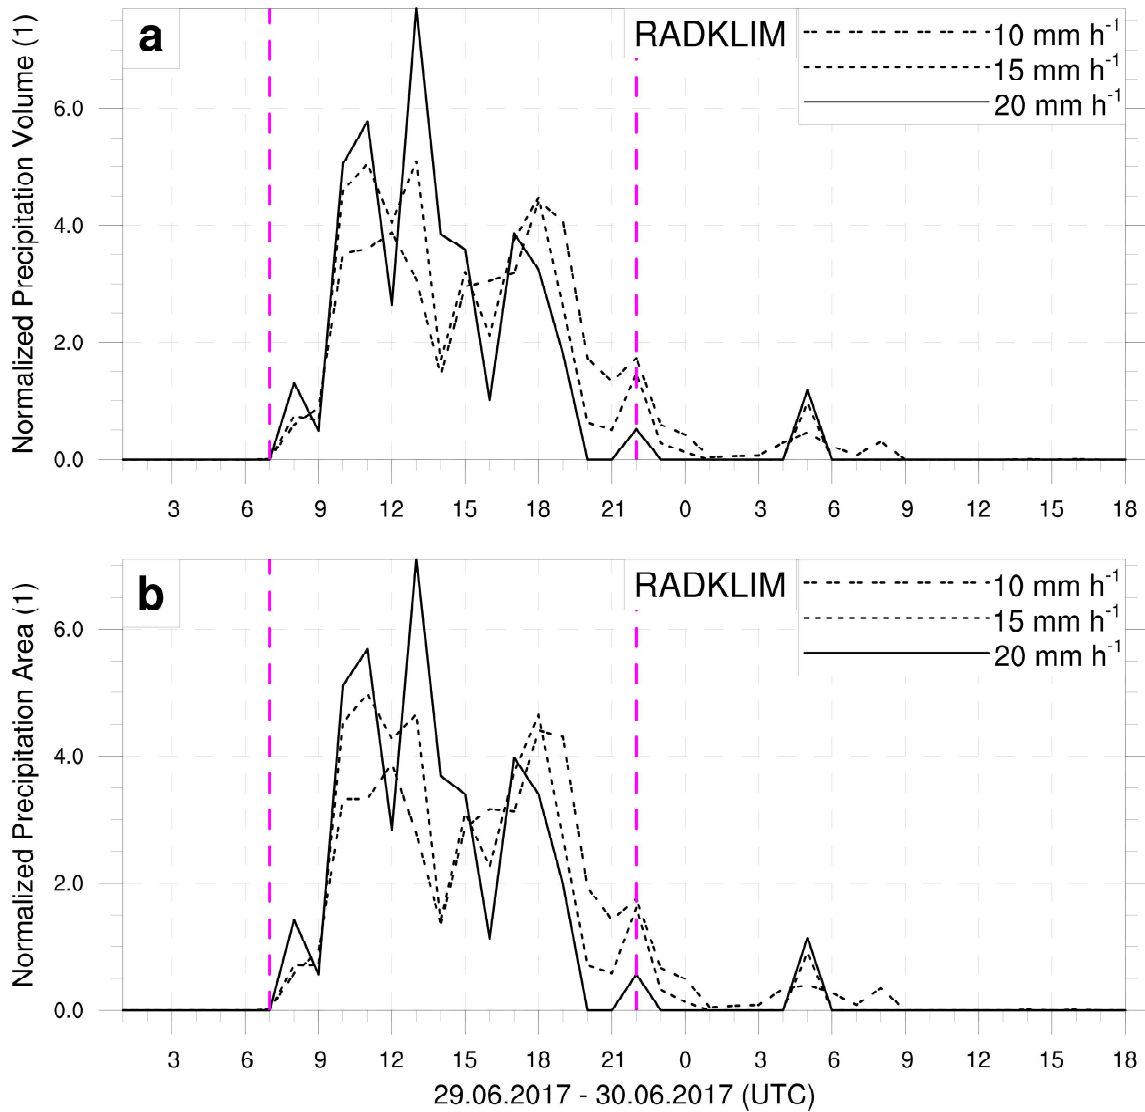

**Figure S5.** Normalized hourly time series of (a) precipitation volume and (b) precipitation area for different minimum precipitation intensities, based on the radar-based RADKLIM data set (Winterrath et al., 2018). The times series is based on the analysis region marked in Figures S6 and S7. The precipitation intensities denote the minimum precipitation intensities considered for each time series, i.e. for (a), the 10 mm h<sup>-1</sup> line represents the total precipitation volume based on all grid cells with an hourly rate above 10 mm h<sup>-1</sup>. The vertical magenta lines mark the time period (i.e. accumulation time) chosen for the analysis presented in Section 3.6.1 of the main manuscript and below.

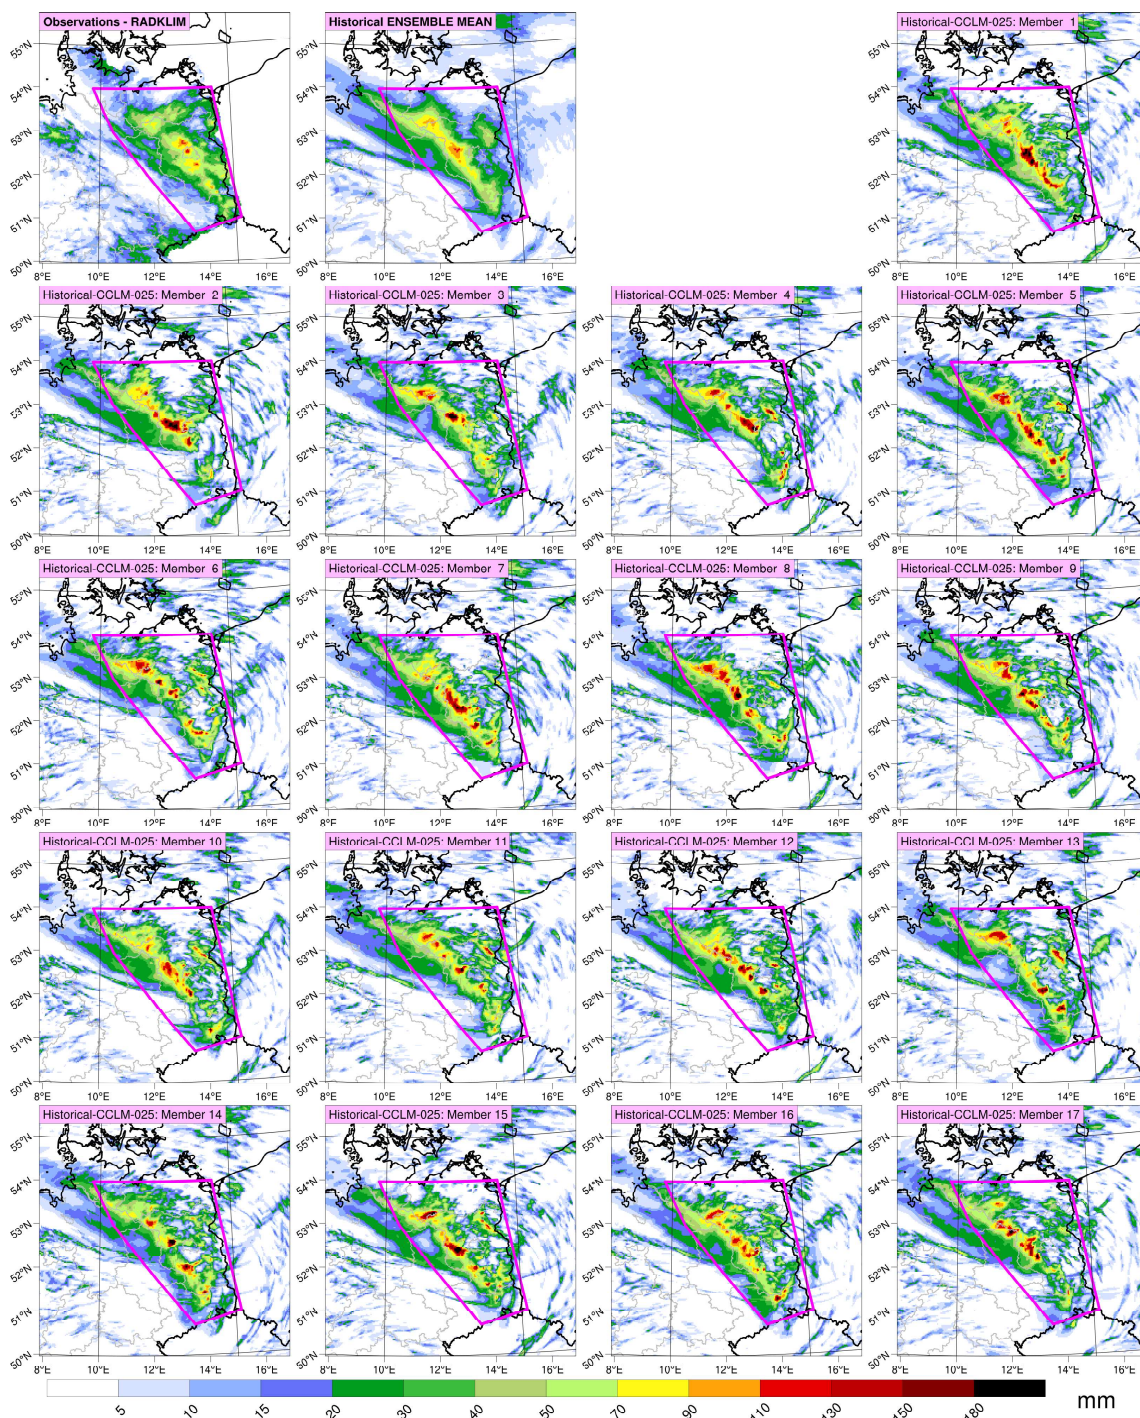

**Figure S6.** Pre-industrial COSMO-CLM ensemble: event total precipitation accumulations for observations (top left), ensemble mean (top, second from left) and all 17 ensemble members. The magenta box marks the analysis region used in the main manuscript. The accumulation period is as shown in Figure S5. Note that, for fair comparison, the RADKLIM data have been spatially aggregated to the COSMO-CLM  $0.025^\circ$  grid.



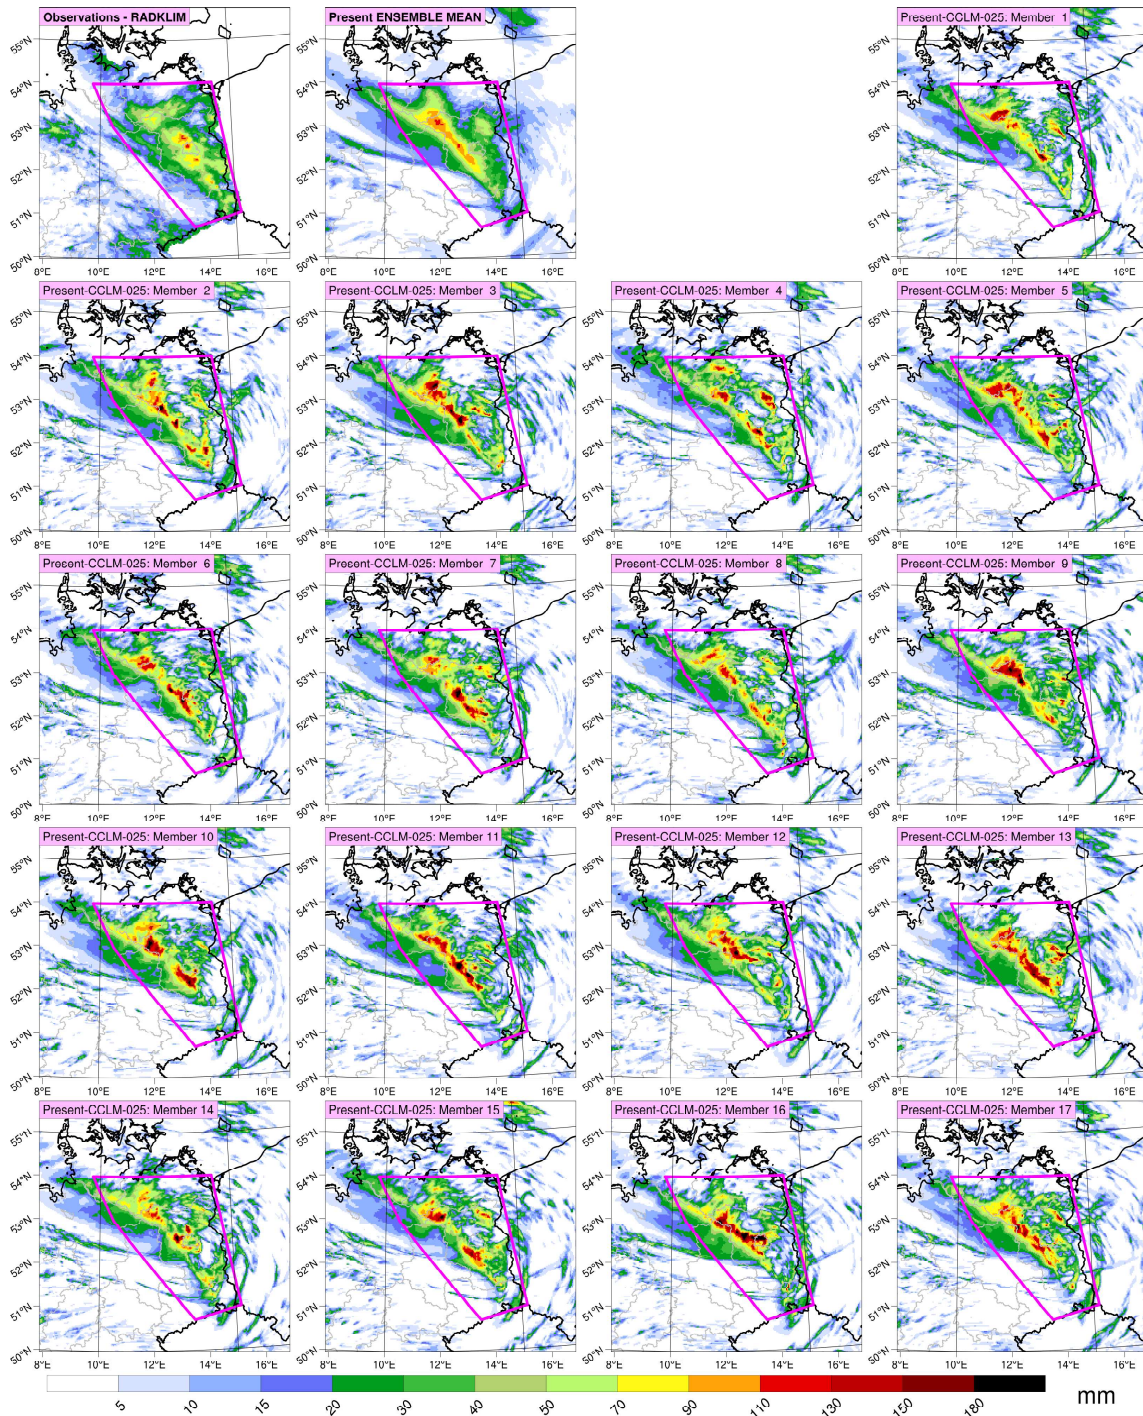

Figure S7. As in Figure S6, except for the present-climate ensemble.
